# Supplementary material
Source: PubMed Central journal article supplement (PMC3193500)
Supplement: cr201139x1.pdf [file cr201139x1.pdf]

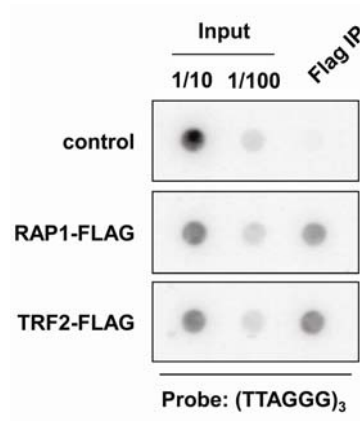

**Supplementary information, Figure S1** Ectopically expressed RAP1-FLAG and TRF2-FLAG bind telomeres.

HTC75 cells expressing vector control, RAP1-FLAG, or TRF2-FLAG were analyzed by chromatin immunoprecipitation (ChIP) using anti-FLAG antibodies. The co-precipitated DNA was analyzed by dot-blotting with the indicated probe.
