# Supplementary material
Source: PubMed Central journal article supplement (PMC3193500)
Supplement: cr201139x2.pdf [file cr201139x2.pdf]

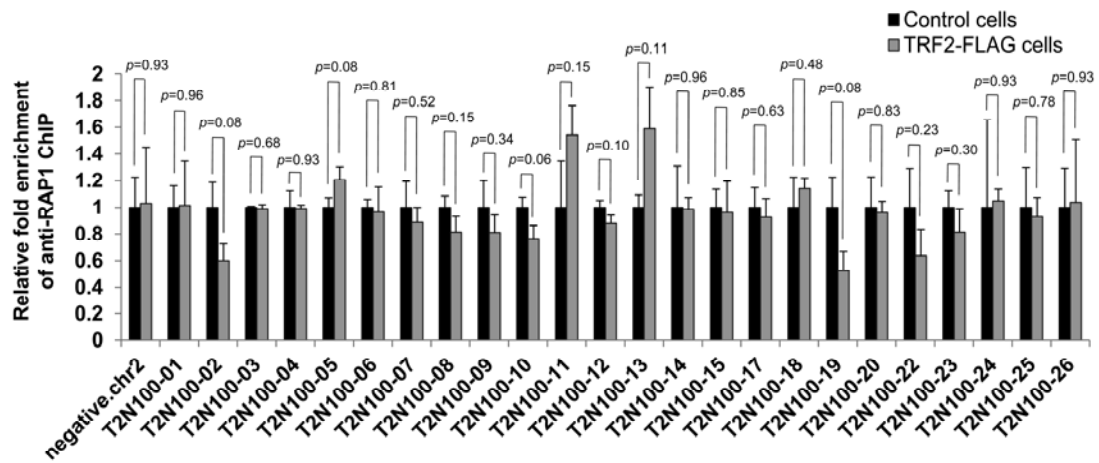

**Supplementary information, Figure S2** Overexpression of TRF2 does not increase the binding of RAP1 at interstitial sites.

Anti-RAP1 ChIP was performed using HTC75 cells expressing vector control or TRF2-FLAG. The qPCR data were normalized to input and the results were normalized to control levels. Primer pairs were derived from the predicted T2N100 sites and listed in Table S1. Sequences from chromosome 2 were used as negative control for qPCR. Error bars indicate standard error ( $n = 3$ ).  $p$  values were calculated by Student  $t$  test.
