# Supplementary material
Source: PubMed Central journal article supplement (PMC3193500)
Supplement: cr201139x3.pdf [file cr201139x3.pdf]

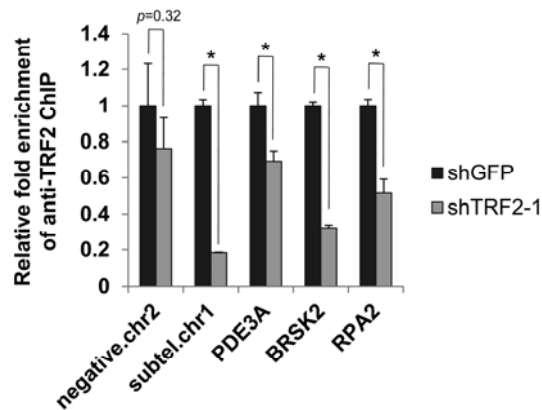

**Supplementary information, Figure S3** Knockdown of TRF2 decreases its binding to target genes.

ChIP-qPCR analysis with anti-TRF2 antibodies was carried out using control (shGFP) or TRF2 knockdown (shTRF2-1) cells. The qPCR data were normalized to input and the results were normalized to control levels. Error bars indicate standard errors ( $n = 3$ ).  $p$  values were calculated by Student  $t$  test and \* indicates  $P < 0.05$ .
