# Supplementary material
Source: PubMed Central journal article supplement (PMC3193500)
Supplement: cr201139x4.pdf [file cr201139x4.pdf]

**Supplementary Information, Table S1. A list of primers used in real-time quantitative PCR**

| <b>Primers used for real time qPCR to examine gene expression</b> |                            |
|-------------------------------------------------------------------|----------------------------|
| Name                                                              | Sequence                   |
| RAP1-F                                                            | GGCTACTTCCGCCTTCTTAGC      |
| RAP1-R                                                            | TCGGGACCAAATGGGATATC       |
| 18S RNA-F                                                         | CGAACGTCTGCCCTATCAACTT     |
| 18S RNA-R                                                         | ACCCGTGGTCACCATGGTA        |
| subtel.RPH3AL-F                                                   | GGCAGCTCGTCGGTGTTT         |
| subtel.RPH3AL-R                                                   | GCCTCGATCCACATTTGG         |
| CLIC6-F                                                           | TGTGACCACAGTGGACCTGAA      |
| CLIC6-R                                                           | CCGGGAGCCAGGTTCTG          |
| SCARF1-F                                                          | CACAAGCTACCCTGGGTGACA      |
| SCARF1-R                                                          | CTCGATGAAGCTGTGGTTGAAG     |
| PAK2-F                                                            | TGGTCGGAACGCCATACTG        |
| PAK2-R                                                            | GGGCCATAAGCTTCCGTGTA       |
| AL162458.5-F                                                      | CAGGAACAGACAGTGACCAATCAG   |
| AL162458.5-R                                                      | TCTGCCGTGGTGATCTCTTG       |
| subtel.OPRL1-F                                                    | AGGTCGAGGATGAAGAGATCGA     |
| subtel.OPRL1-R                                                    | CACCGGGCCCCAGTAATC         |
| PDE3A-F                                                           | AGGACCTCCCTGCCCTGTAT       |
| PDE3A-R                                                           | CCTCGTTTGTGGTCCCATT        |
| RPA2-F                                                            | TTCGCCAGTGGGTTGACA         |
| RPA2-R                                                            | TGTTTCTGGAGGAACCACAGTGT    |
| BRSK2-F                                                           | GATGTCCAACCTGACACCAGAGT    |
| BRSK2-R                                                           | AAGTTCCCAAACCAGGACTTCTT    |
| TBC1D2B-F                                                         | CTCCTGGCGGAATCCAGATA       |
| TBC1D2B-R                                                         | CCACTGCCACCAACCTGTTT       |
| <b>Primers used for validation of ChIP-seq</b>                    |                            |
| Name                                                              | Sequence                   |
| negative.chr2-F                                                   | CCAGGACTTGGCTTGAGCTT       |
| negative.chr2-R                                                   | CAGGATTCAAGTCAGGAAGATTTAGG |
| subtel.chr1-F                                                     | GCTGTATTGCAGGGTTCAACTG     |
| subtel.chr1-R                                                     | GGGTGTCATGTGTGCATTAGGA     |
| subtel.OPRL1-F                                                    | TGTGGACTTGGGAAGCCTTTTG     |
| subtle.OPRL1-R                                                    | CCTACAGTTGCCAGAGGTTTCTG    |
| subtel.AC126281.1-F                                               | CCTTGCCAGGTTCCAAACC        |
| subtel.AC126281.1-R                                               | TCTCGTTCATTTCCACGTAGAAGA   |
| CLIC6-F                                                           | GGCCTTCTGCCTAATCTGTGA      |
| CLIC6-R                                                           | GCCCCAGAGAGACACATTAGAGTT   |
| SCARF1-F                                                          | GCAGTGAAGCTCAGGTGCAA       |
| SCARF1-R                                                          | TCTGTACCTGCTGGATTTGG       |
| PAK2-F                                                            | TGGGCTGCACTCTGCTAGAA       |
| PAK2-R                                                            | CAGCACTAAATGGCACCATAAGC    |
| SSU_rRNA_5(chr21)-F                                               | CACGGCCGGTACAGTGAAA        |

|                     |                           |
|---------------------|---------------------------|
| SSU rRNA_5(chr21)-R | CGACCAAAGGAACCATAACTGAT   |
| KIAA0020-F          | TCACAGTGAGACCAGACAGATCCT  |
| KIAA0020-R          | CTGTTTGCTAGACTCTGCATTTGAG |
| AL162458.5-F        | CGCCTAACTCTACCCGAAGCT     |
| AL162458.5-R        | TGCCGGAGTCAGAGAGGAA       |
| AC114291.1-F        | ACCTCGGCCCTCTTTGCT        |
| AC114291.1-R        | TGAACAGTAGATGGGAGATCAGATG |
| AC013473.1-F        | CACTTGAGGGCACTGCTCTGT     |
| AC013473.1-R        | AGGTGAGCCCTCAGACAAACA     |
| not define.chr11-F  | ACCTCCAGGCACCATGGA        |
| not define.chr11-R  | TGGAGAGGGCAGGTTTTTCAG     |
| not define.chr2-F   | GCAGTGGCTCAGGCCTGTAA      |
| not define.chr2-R   | CATGATCCGCCCACTTCAG       |
| subtel.IQSEC3-F     | TCAGTTTGAGTGGCCCTATCTTG   |
| subtel.IQSEC3-R     | GTATTAACCCCAACTTTCTGAAGAG |
| subtel.AL137028.1-F | AAGCGATCCTCCCATCTCAA      |
| subtel.AL137028.1-R | GCATAGTGGCAAGCACCTGTAG    |
| PDE3A-F             | TGCATGGCCGTTCTTAGTTG      |
| PDE3A-R             | CAGAGTCTCGTTCGTTATCGGAAT  |
| RPA2-F              | TCAGAGCACTGGGCAGAAATC     |
| RPA2-R              | GGCAACCAGGGAAATCTGTTT     |
| TBC1D2B-F           | ACAGAGGATATGAGGGCTTAAAGC  |
| TBC1D2B-R           | GAGGATCCCAGCACCTGTTAGA    |
| RYR2-F              | CATGAATGGATGAACGAGATTCC   |
| RYR2-R              | CCCTTGGCTGTGGTTTTCG       |
| BRSK2-F             | GCGGTCACCACGCCTTT         |
| BRSK2-R             | TCCGGCGTCGGAAGT           |
| AC098691.2-F        | CCTATTAGTGGGTGAACAATCCAA  |
| AC098691.2-R        | TCGGCTCTTCTATCATTGTGA     |
| AL928646.2-F        | TCTGCCAGTGCTCTGAATG       |
| AL928646.2-R        | CGTTTACCCGCGCTTCAT        |
| not define.chr7-F   | CGGCGGGAGTAACTATGACTCT    |
| not define.chr7-R   | TGCGCGTCACTAATTAGATGACA   |
| not define.chr3-F   | GAGCTGTGTGGTCTGGCAAAG     |
| not define.chr3-R   | CAGCACCCTGTGCAGACAAG      |

**Primers used for validation of T2N100 sites**

| Name        | Chromosome               | Sequence                     |
|-------------|--------------------------|------------------------------|
| T2N100-01-F | chr1:11500016-11500081   | TCCCTTGAAGTATGCCTTCCA        |
| T2N100-01-R |                          | GGCGGTAGAGAAAGAGGAATTG       |
| T2N100-02-F | chr1:18580774-18580842   | GTCCAGAGGGCCCCATTT           |
| T2N100-02-R |                          | TCGCTGTATTCAGATAGAGGTCTAGATC |
| T2N100-03-F | chr2:122916890-122916957 | ACCCTGCTCTTGGCTGTGAT         |
| T2N100-03-R |                          | AATGGCTTTCCTTGACTTACACATC    |
| T2N100-04-F | chr3:159412074-159412129 | CAAGGCGGGCACATCAC            |
| T2N100-04-R |                          | ACCATGTTGGCCAGGCTAGT         |

|             |                 |                                |
|-------------|-----------------|--------------------------------|
| T2N100-05-F | chr4:6425456-   | GGAGGGAGCTAGAGGGTAGGAA         |
| T2N100-05-R | 6425521         | CACTACCTCCCTGATCTTTCAGTTC      |
| T2N100-06-F | chr4:8348946-   | GCATCCCCAGAGCTGTTATCC          |
| T2N100-06-R | 8349013         | TTTAGGCCCTGCCTCAGTTC           |
| T2N100-07-F | chr5:16348051-  | CCAACCTCTGCAAGCTACAAA          |
| T2N100-07-R | 16348112        | TGCAGCTGGAGATCCTTGTACA         |
| T2N100-08-F | chr5:40728968-  | CCCGTCCCTAATGAACATCTTT         |
| T2N100-08-R | 40729050        | TGGTTTGAAATGCCAGTAGTG          |
| T2N100-09-F | chr7:44136809-  | GCGACAGGGCAGCTACA              |
| T2N100-09-R | 44136867        | TGCCAATGATTCCGACATCTC          |
| T2N100-10-F | chr7:85236754-  | AAGCCCCGCACATGAGTCT            |
| T2N100-10-R | 85236810        | CTTTTTGGAGTCCAGGCTTCA          |
| T2N100-11-F | chr9:71880036-  | TTGTGGACATGGTCTGGAA            |
| T2N100-11-R | 71880107        | GCTTATGTGCTAGAGAACATTCTATTTCTT |
| T2N100-12-F | chr9:137102116- | GCCCCTACACCAGCCTTTCT           |
| T2N100-12-R | 137102171       | TGCTCAAGGGCAGGAGAGA            |
| T2N100-13-F | chr10:4111426-  | CCCTGATCTCCAGGCTTGTG           |
| T2N100-13-R | 4111487         | CTGATTATGTGACCAAGGCAATG        |
| T2N100-14-F | chr11:10686591- | GCAAACAGCCTATCCTTTATAATGC      |
| T2N100-14-R | 10686672        | AAGCAGCACAGTAGAGAGGTGAGA       |
| T2N100-15-F | chr11:62795791- | CAGTTCTGGTTTTCTGCTAGCTTCT      |
| T2N100-15-R | 62795853        | AGAGTGCGTCCAGAGGTCAAG          |
| T2N100-16-F | chr15:22520992- | TCCCTCCATCTAGCCAGCAA           |
| T2N100-16-R | 22521053        | CCACCCTACACACCACTCAGATT        |
| T2N100-17-F | chr15:80755617- | GTCCTTGTAAGGCAGGAAGAGATT       |
| T2N100-17-R | 80755675        | GGCGTTTGCTCTGCAACCT            |
| T2N100-18-F | chr16:49816969- | TCCCTGAAACCCACATCA             |
| T2N100-18-R | 49817027        | TGGCAGACACCAGAAACATCA          |
| T2N100-19-F | chr16:75368217- | GGGTAAAAAGGACCGGAAA            |
| T2N100-19-R | 75368277        | AGGTGGGACTGCCGTACAGT           |
| T2N100-20-F | chr16:87557923- | GGTTCTTCCTCCACCCTACACA         |
| T2N100-20-R | 87557992        | CCTTCCATCTAGGCAGCAACTG         |
| T2N100-21-F | chr17:76468507- | CCACCCGATGGCTGCTT              |
| T2N100-21-R | 76468558        | CGCCAGCTTCCTGCAA               |
| T2N100-22-F | chr20:10172210- | TTAGGGTTCAAGTTGTCATCATCCT      |
| T2N100-22-R | 10172271        | AGCCAGGGCACCAGTTAAGA           |
| T2N100-23-F | chr21:39207927- | CTGAGAGGCCAGGACAGAGTCT         |
| T2N100-23-R | 39207986        | CCCAAACCGTGCCATCAT             |
| T2N100-24-F | chr22:16477703- | CCAAGAAACCAAATGAAAATGCA        |
| T2N100-24-R | 16477824        | CCAATCTGTGGGTTGTCTATTTACTC     |
| T2N100-25-F | chr22:43261870- | TTCGGGAGGTCTAGCACCTAGT         |
| T2N100-25-R | 43261927        | ACGGCCAGTGGACCAAAA             |
| T2N100-26-F | chrX:50749090-  | AAACCAGATTCTGACCCTGACACT       |
| T2N100-26-R | 50749183        | CACAGCCTGTCAAAGTCAGTCAA        |
